# Supplementary material
Source: PubMed Central journal article supplement (PMC9001751)
Supplement: NIHMS1746438-supplement-Supplementary_Materials__figures__tables.pdf [file NIHMS1746438-supplement-Supplementary_Materials__figures__tables.pdf]

**Expression of ectopic heat shock protein 90 (eHsp90) in male and female primary afferent nociceptors regulates inflammatory pain**

**Supplemental Materials**

**Movie S1. 3D reconstruction of whole-body cryoimaging of a female mouse 6 hours after HS-131 administration on day 3 post CFA.**

## Supplemental Figure 1

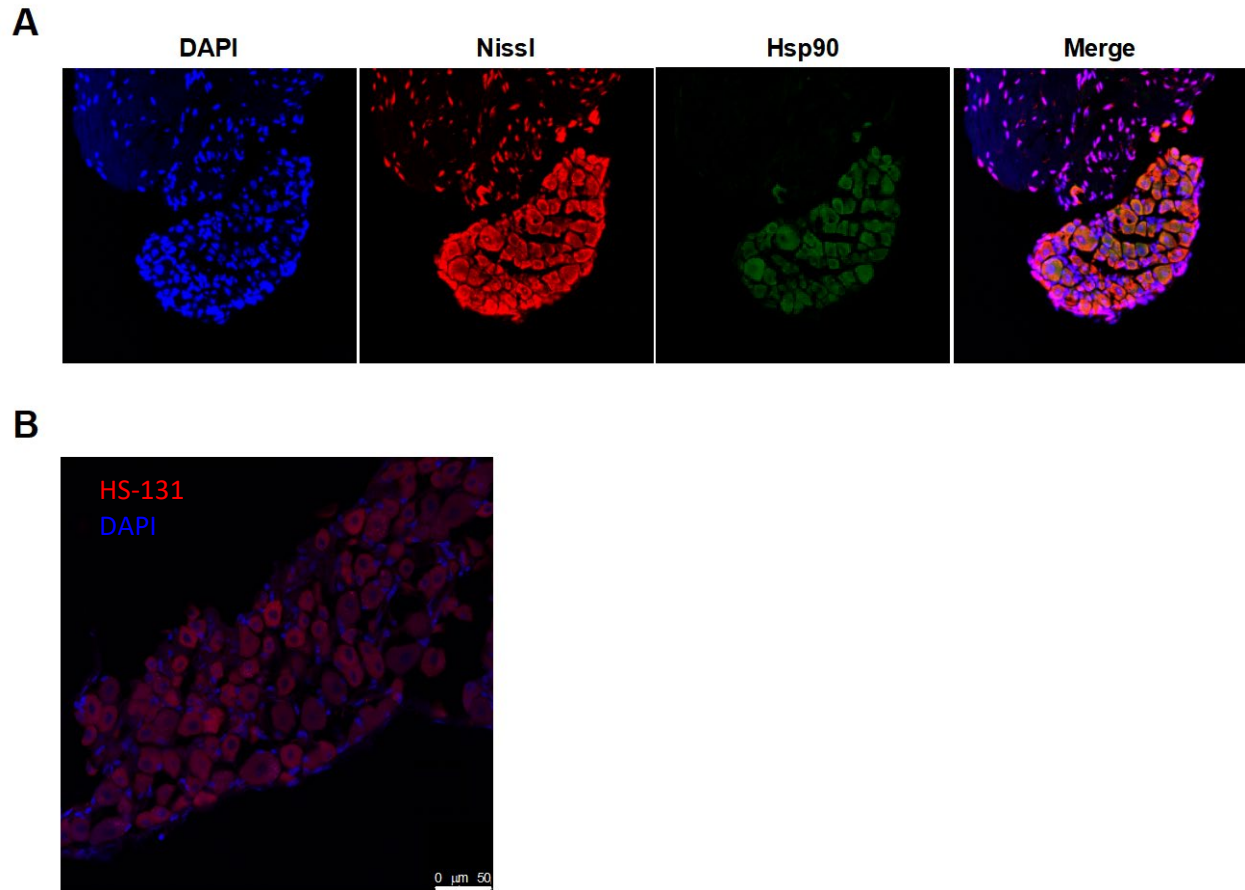

**Fig S1. DRG neurons express Hsp90.** (A) IHC analysis of DRG collected from IFA control mice show Hsp90 expression is localized to Nissl+ neurons. (B) Confocal analysis of DRG from mice in the CFA group collected on day 3, 6 hours following administration of the eHsp90 discriminate fluortagged inhibitor HS-131 show eHsp90 staining patterns similar to those observed in our IHC staining. Representative images from 4 mice (2M, 2F) are shown.

Supplemental Figure 2

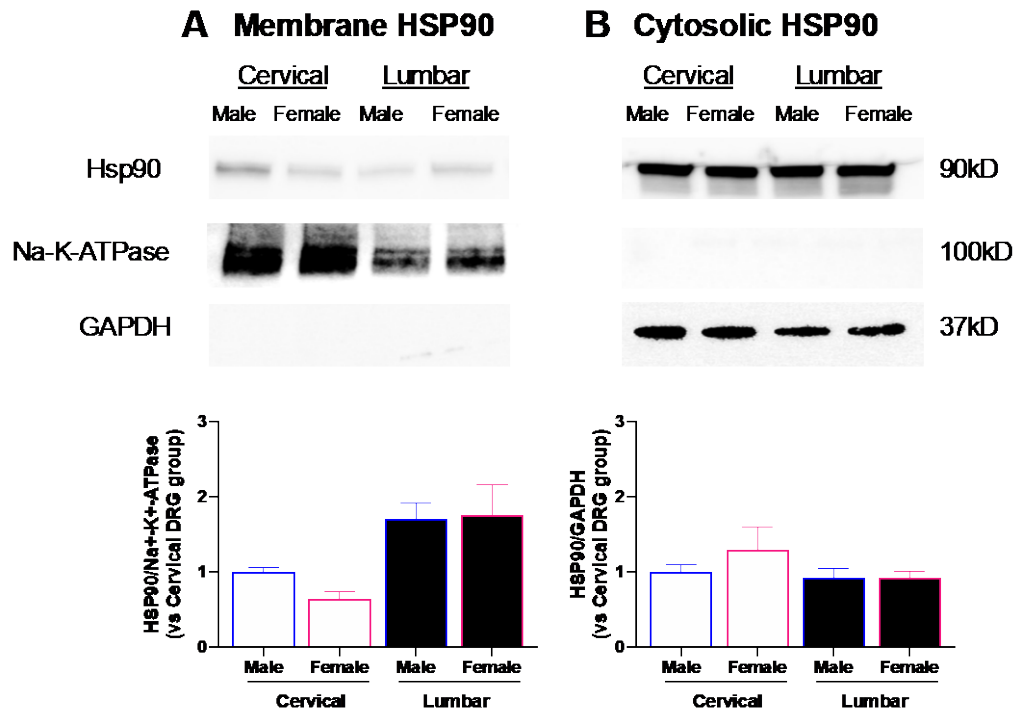

**Fig S2. Intra-plantar IFA injection does not alter membrane or cytosolic Hsp90 expression in lumbar DRG.** Male and female mice in the IFA control group exhibited comparable eHsp90 expression levels in (A) membrane bound and (B) cytosolic fractions isolated from lumbar and cervical DRG. N=12 (3M+3F) per group. Data are mean  $\pm$  SEM.

### Supplemental Figure 3

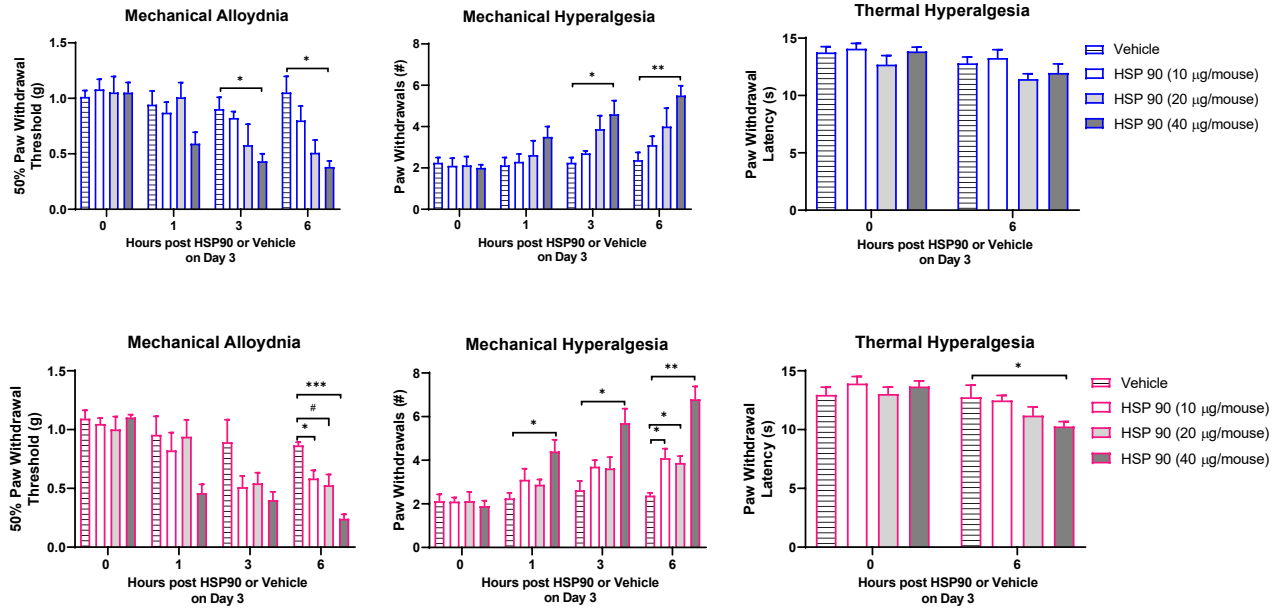

**Fig S3. Systemic Hsp90 administration directly induces pain, to a greater degree in female versus male mice.** Administration of Hsp90 dose-dependently produced mechanical allodynia and hyperalgesia in both male and female mice, and thermal hyperalgesia in female mice. N=8-10 (4-5M+4-5F) 4mice per group. Data are mean  $\pm$  SEM. # $P=0.06$ , \* $P<0.05$ , \*\* $P<0.01$ , \*\*\* $P<0.001$  different from baseline on day 0.

## Supplemental Figure 4

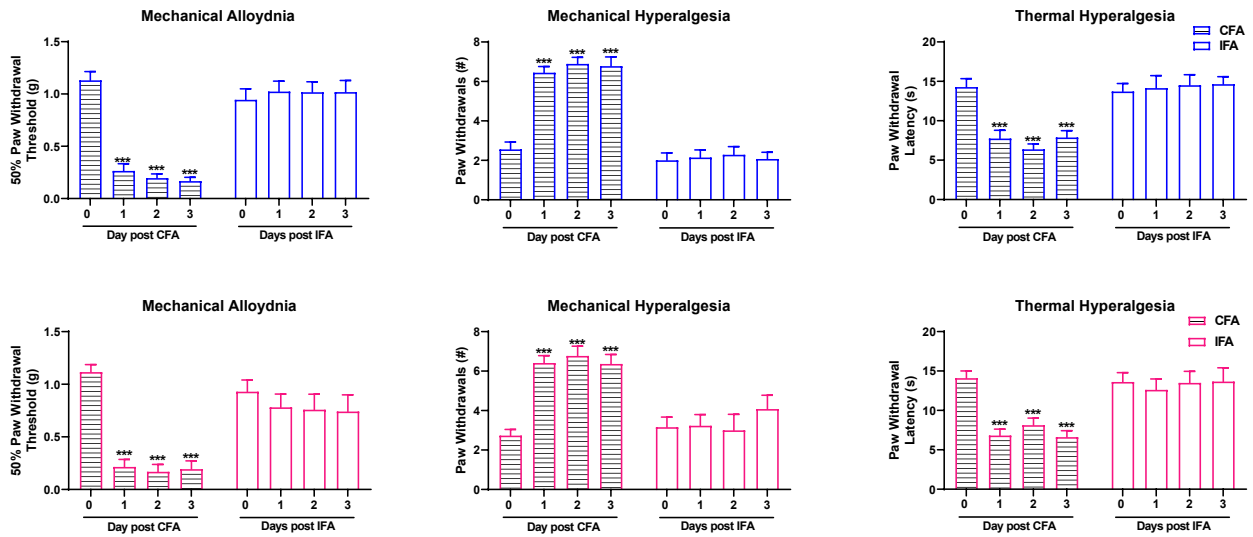

**Fig S4. CFA, but not IFA, induces mechanical and thermal heat pain in the injected hindpaw.** Intraplantar CFA induced mechanical allodynia, mechanical hyperalgesia, and thermal heat hyperalgesia on days 1-3 in both male and female mice. In contrast, IFA had no effect on mechanical or thermal pain. CFA group N=40 (18M, 22F) and IFA group N=27 (14M, 13F) mice. N=3-4 experimental replicates for behavioral assays. Data are mean  $\pm$  SEM. \*\*\* $P$ <0.001, different from baseline on day 0.

## Supplemental Figure 5

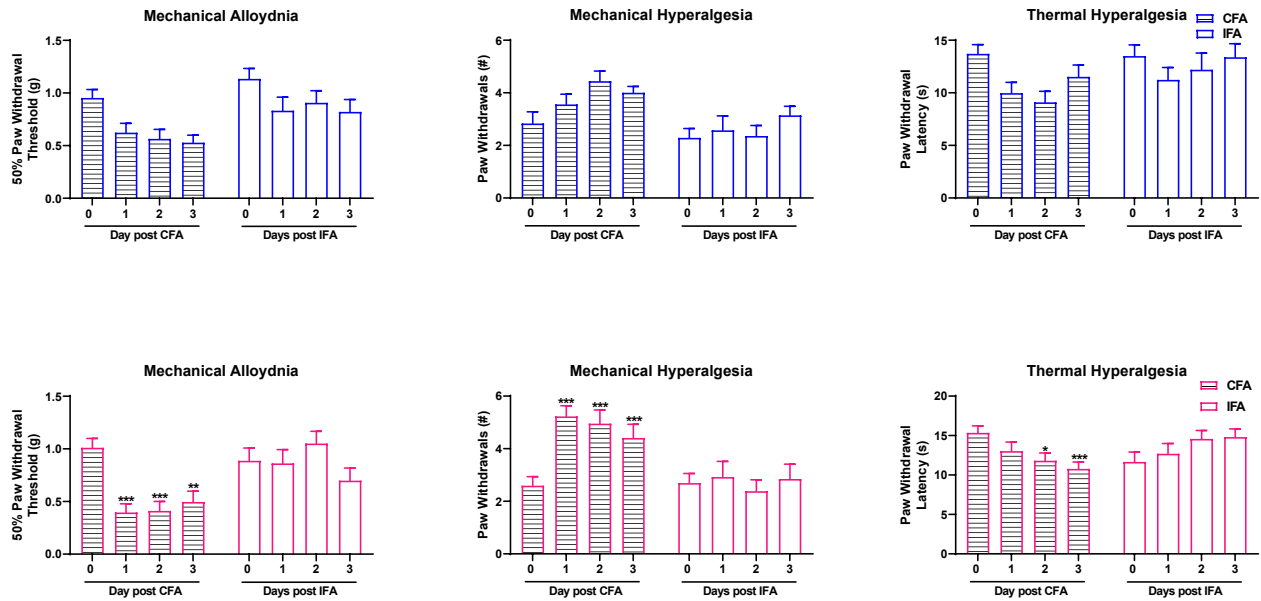

**Fig S5. CFA, but not IFA, induces mechanical and thermal heat pain in the contralateral hindpaw.** Intraplantar CFA induced mechanical allodynia, mechanical hyperalgesia, and thermal heat hyperalgesia on days 1-3 in female mice. Male mice showed similar trends towards CFA-dependent increases in mechanical and thermal pain in their non-injected hindpaws, although not significant. IFA had no effect on mechanical or thermal pain. CFA group N=40 (18M, 22F) and IFA group N=27 (14M, 13F) mice. N=3-4 experimental replicates for behavioral assays. Data are mean  $\pm$  SEM. \* $P$ <0.05, \*\* $P$ <0.01, \*\*\* $P$ <0.001, different from baseline on day 0.

## Supplemental Figure 6

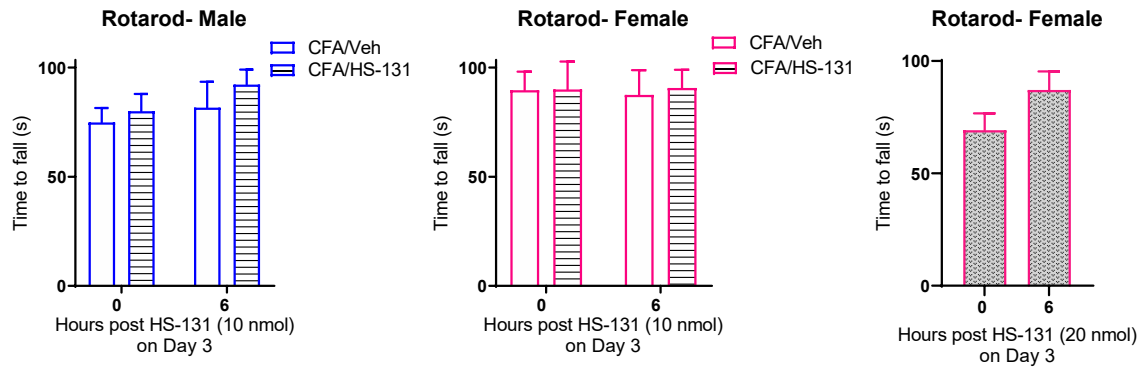

**Fig S6. eHsp90 inhibition does not alter motor function.** Administration of HS-131 (10 nmol or 20 nmol) had no effect on rotarod fall time in male or female mice 6 hours after treatment on day 3 post-CFA. CFA/Veh N=20 (9M, 11F), CFA/HS-131 (10 nmol) N=20 (9M, 11F), and CFA/HS-131 (20 nmol) N=10F mice. Data are mean  $\pm$  SEM.
